# Supplementary material for: Proteorhodopsins dominate the expression of phototrophic mechanisms in seasonal and dynamic marine picoplankton communities
Source: PeerJ journal article supplement (doi:10.7717/peerj.5798), 2018-10-23

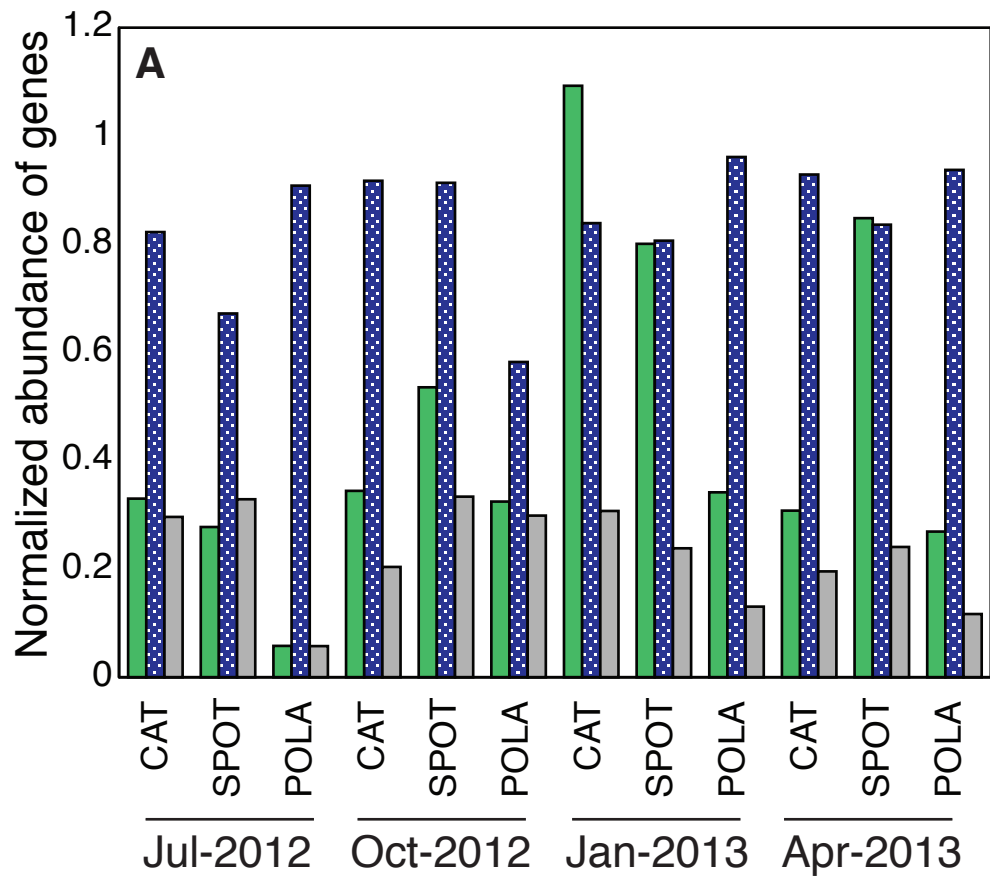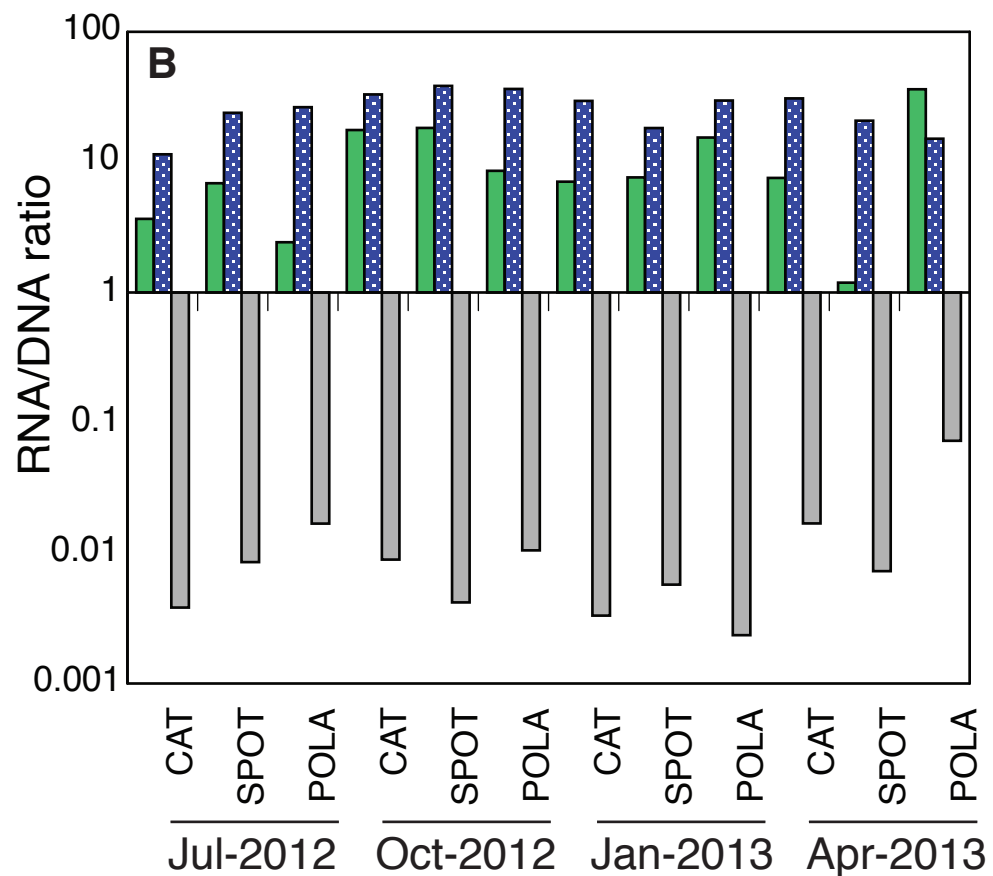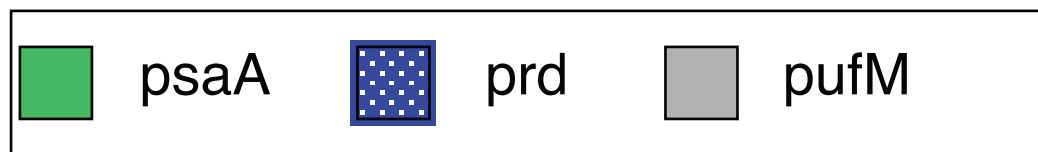

Supplement: sup_fig_S5_barplots.pdf [file sup_fig_S5_barplots.pdf]
